# Supplementary material
Source: PubMed Central journal article supplement (PMC4936916)

**Supplemental Table 1. Descriptive Characteristics for the Children in the Birth****Cohort (N=314)**

| Variables                                                                  | Mean $\pm$ S.D.       | Median | 25 <sup>th</sup> ~ 75 <sup>th</sup> percentile |
|----------------------------------------------------------------------------|-----------------------|--------|------------------------------------------------|
| Duration of exclusive breastfeeding in the 1 <sup>st</sup> 6 months (days) | 115.27 $\pm$ 58.17    | 128    | 64 ~ 170                                       |
| WAZ at Birth                                                               | -1.42 $\pm$ 0.95      | -1.41  | -2.05 ~ -0.78                                  |
| WAZ at 6 months                                                            | -1.23 $\pm$ 1.07      | -1.24  | -1.89 ~ -0.47                                  |
| WAZ at 12 months                                                           | -1.49 $\pm$ 1.05      | -1.47  | -2.17 ~ -0.76                                  |
| HAZ at Birth                                                               | -0.97 $\pm$ 1.11      | -1.00  | -1.69 ~ -0.26                                  |
| HAZ at 6 months                                                            | -1.32 $\pm$ 1.04      | -1.32  | -1.96 ~ -0.67                                  |
| HAZ at 12 months                                                           | -1.62 $\pm$ 1.07      | -1.61  | -2.33 ~ -0.94                                  |
| No. of diarrhea episodes in the 1 <sup>st</sup> 6 months                   | 2.00 $\pm$ 1.55       | 2      | 1 ~ 3                                          |
| Family income (Taka)                                                       | 7045.32 $\pm$ 3669.59 | 6000   | 4500 ~ 8500                                    |

**Supplemental Table 2. Association of Independent Variables with Oral Polio Vaccine Type 3 Failure**

| Characteristics <sup>1</sup>                       | Odds Ratio | 95% CI       | p-value |
|----------------------------------------------------|------------|--------------|---------|
| ≥ 2 diarrhea episodes in 1 <sup>st</sup> 6 months  | 2.35       | (1.12, 4.94) | 0.0245  |
| WAZ ≥ -2 at 6 months                               | 0.62       | (0.28, 1.39) | 0.2443  |
| Breastfeeding duration in 1 <sup>st</sup> 6 months | 0.91       | (0.75, 1.09) | 0.3003  |
| Family income (1000 Taka) <sup>2</sup>             | 0.88       | (0.77, 1.01) | 0.0599  |

<sup>1</sup>Type 3 vaccine failure was defined as  $\log_2(\text{serum neutralizing antibody titer}) < 3$ . A generalized linear model with GEE (i.e., longitudinal logistic regression) was used to evaluate the association of predictors (in the table) with the probability of repeated OPV failures at 6 and 12 months of age.

<sup>2</sup> The family income were standardized in 1000 Taka, such that the corresponding odds ratio were interpreted as the odds of OPV failure for every 1000-Taka increment (one Taka equals approximately \$0.013 US dollars).

Supplemental Figure 1

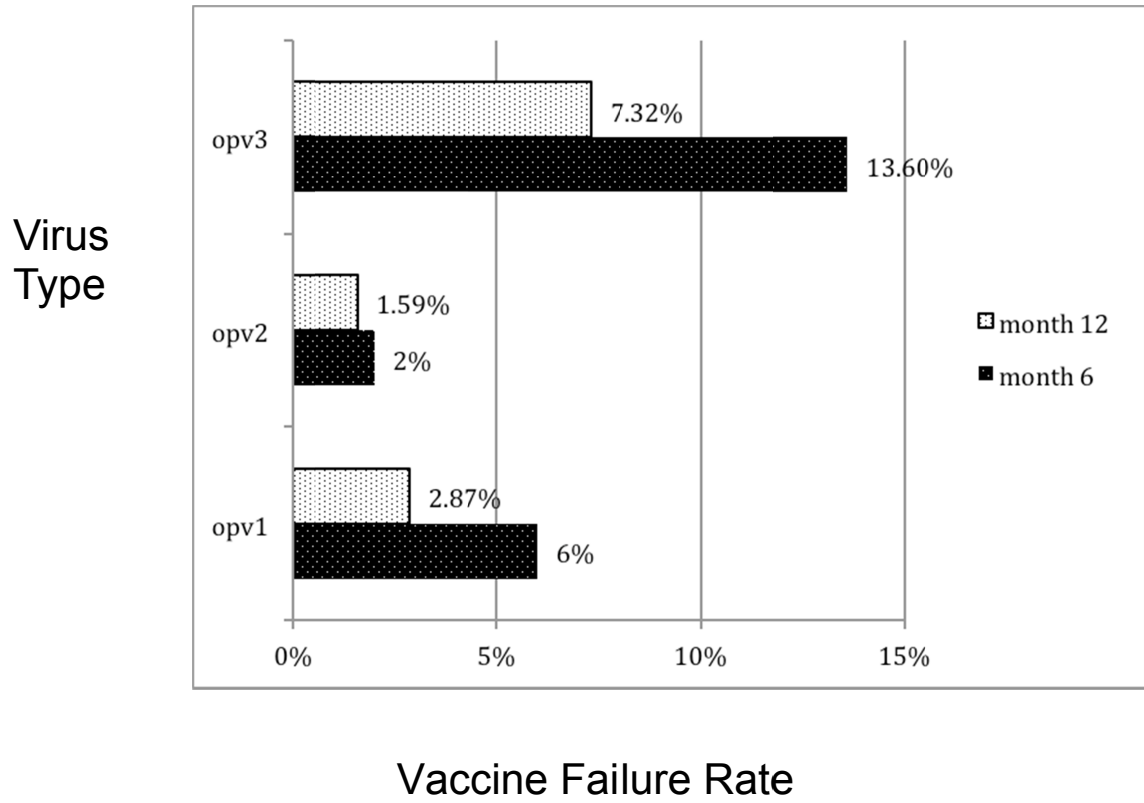

Supplement: NIHMS613588-supplement-Supplement.pdf [file NIHMS613588-supplement-Supplement.pdf]
